# Supplementary material for: A robotic approach to polymerisation kinetics: a case study on copolymerisation parameter estimation
Source: Royal Society of Chemistry journal article supplement (doi:10.1039/d6sc02232d), 2026-04-17
Supplement: d6sc02232d1.pdf [file d6sc02232d1.pdf]

## Supporting Information

# A Robotic Approach to Polymerisation Kinetics: A Case Study on Copolymerisation Parameter Estimation

*Lachlan Alexander*<sup>†a</sup>, *Vianna F. Jafari*<sup>†a</sup> and *Tanja Junkers*<sup>\*a</sup>

<sup>a</sup> Polymer Reaction Design group, School of Chemistry, Monash University, 17 Rainforest Walk,  
Clayton VIC 3800, Australia.

<sup>†</sup> These authors contributed equally to this work.

\*Email: [tanja.junkers@monash.edu](mailto:tanja.junkers@monash.edu)

---

### Table of Contents:

|                                                                                                                                                |    |
|------------------------------------------------------------------------------------------------------------------------------------------------|----|
| 1. Experimental Section .....                                                                                                                  | 2  |
| 2. Supporting Figures .....                                                                                                                    | 5  |
| 3. Supporting Tables .....                                                                                                                     | 10 |
| 4. Procedure to use Python to remotely control the OT-2 robot and run copolymerisation<br>experiments .....                                    | 22 |
| 5. Comparison of simulated copolymer composition curves from reactivity ratios measured via 96-<br>well plate and 48-well reactor formats..... | 25 |
| 6. References .....                                                                                                                            | 33 |

## 1. Experimental Section

### Materials

Butyl methacrylate (99%), Butyl acrylate (99%), Styrene (99%), Methyl methacrylate (99%), and Glycidyl methacrylate (97%) were purchased from Sigma-Aldrich and passed through a column of Aluminium oxide to remove inhibitors before use. 2,2'-Azobis(2-methylpropionitrile) (AIBN, 12 wt. % in acetone, Sigma-Aldrich) was recrystallized twice and used. Toluene (Merck), N,N-Dimethylformamide (Univar) and Chloroform-D (D, 99.8%, Cambridge Isotope Laboratories) were used as received.

### Equipment

#### *HTP Reactor Method:*

A Para-Dox Temperature Controlled Reactor (TCR) (Analytical Sales and Services, Inc.) was used for polymerisation experiments. A heater circulator (VEVOR) containing water heated to 75 °C was used to circulate hot water through the TCR. A Biosan PST-100HL Plate Shaker-Thermostat was used for agitation during polymerisation with shaking at 400 rpm. An Opentrons OT-2 liquid handling robot equipped with 11 deck slots was used for all liquid transfers and automation workflows, via Python code executed in PyCharm IDE Community Edition.

#### *96-Well Plate Method:*

A Greiner polypropylene 96-well plate was used for polymerization experiments. Nunc™ Aluminium Seal from Thermo Fisher was used to cover and seal well-plates. A Biosan PST-100HL Plate Shaker-Thermostat was used for polymerization at 70 °C with shaking at 250 rpm. An Opentrons OT-2 liquid handling robot equipped with 11 deck slots was used for all liquid transfers and automation workflows via Python code executed in PyCharm IDE Community Edition.

### Characterization:

A 400 MHz Bruker Avance III Nuclear Magnetic Resonance Spectrometer was used for NMR analysis. To determine monomer conversion, 30 µL of crude polymer aliquots were automatically dispensed and mixed with 600 µL Chloroform-D. Total monomer conversion ( $X$ ) was calculated by comparing the integration of the vinyl monomer peaks (BMA:  $\delta \sim 5.40-5.50$  ppm, BA:  $\delta \sim 6.20-6.40$  ppm, St:  $\delta \sim 5.10-5.20$  ppm, MMA:  $\delta \sim 5.40-5.50$  ppm, GMA:  $\delta \sim 5.55-5.65$  ppm) for  $t_0$  and  $t_1$  samples, using DMF as internal standard. As an example, vinyl peaks of monomers BMA and BA are shown below.

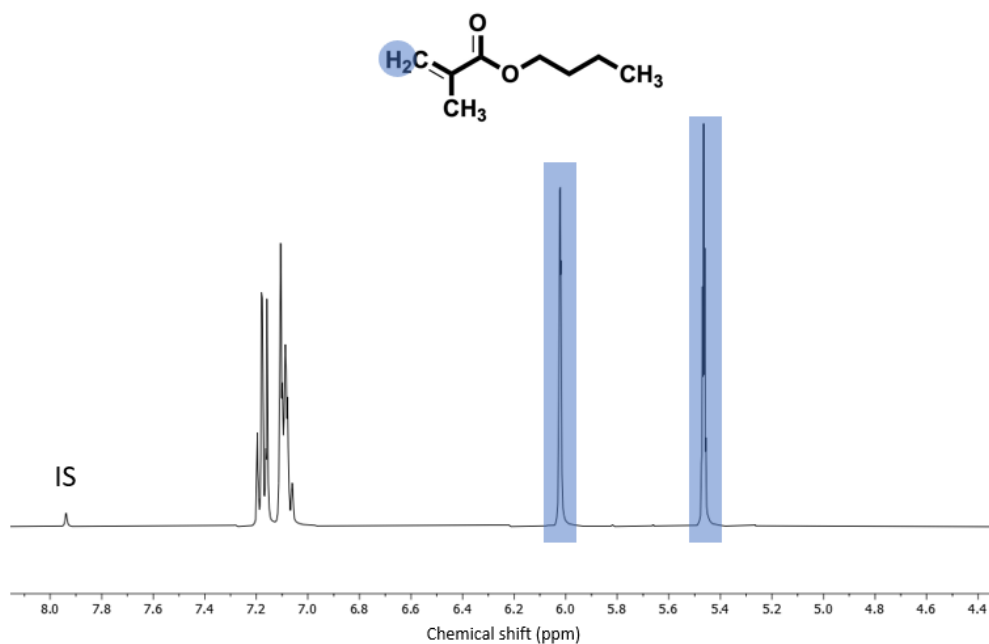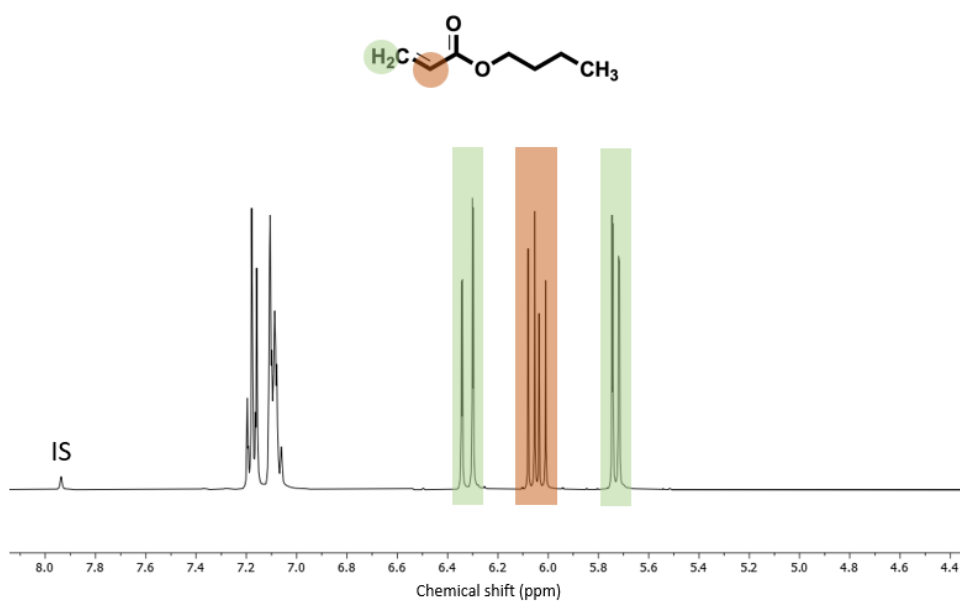

To calculate monomer conversion for mixtures of BMA and BA, vinyl peaks at  $\delta \sim 5.40\text{-}5.50$  ppm (BMA) and  $\delta \sim 6.20\text{-}6.40$  ppm (BA) are integrated with respect to the internal standard for two samples at  $t_0$  and  $t_{2h}$ . Values obtained at this stage are subsequently used in the excel file provided by IUPAC to prepare datasets for reactivity ratio measurement.

#### General synthesis protocol:

For copolymerisation of given monomers  $M_1$  and  $M_2$ , a total monomer concentration of 4 M was used with a 400  $\mu\text{L}$  total reaction volume. Copolymerisation reaction mixtures were prepared and performed at different comonomer ratio and varying AIBN initiator wt. % with respect to total monomer mass. For example, for a copolymerisation reaction of BMA and BA with equal molar ratio and 1 wt. % AIBN

with a total reaction volume of 400  $\mu\text{L}$ , the following were added to the reaction mixture: 0.8 mmol BMA, 0.8 mmol BA, 0.016 mmol AIBN, and 158  $\mu\text{L}$  reaction solvent (constituting 5 vol.% DMF in Toluene, with DMF added in as an internal standard for NMR analysis).

**Use of Contour for the prediction of reactivity ratios:**

In order to perform calculations using the Contour program,<sup>[1]</sup> a *csv* file was prepared for each monomer pair, including four columns of data including initial monomer-1 fraction ( $f_{10}$ ), total monomer conversion ( $X$ ), cumulative copolymer composition ( $F_1$ ), and the calculated error in  $F_1$ . An excel spreadsheet provided by the IUPAC working group was used to prepare the datapoints for the *.csv* file, which is also provided in the supporting information of this work. (Monomer composition values at  $t_1$  ( $f_1$ ) were calculated using the integration values for both monomers at  $t_1$ .)

## 2. Supporting Figures

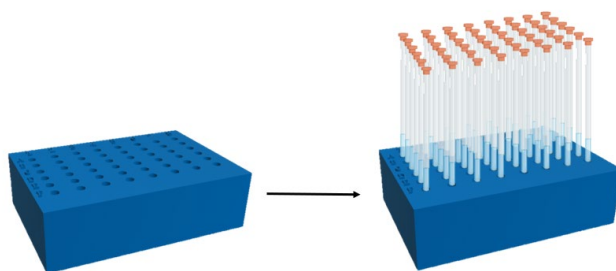

*Figure S 1. 3D design of the NMR tube holder.*

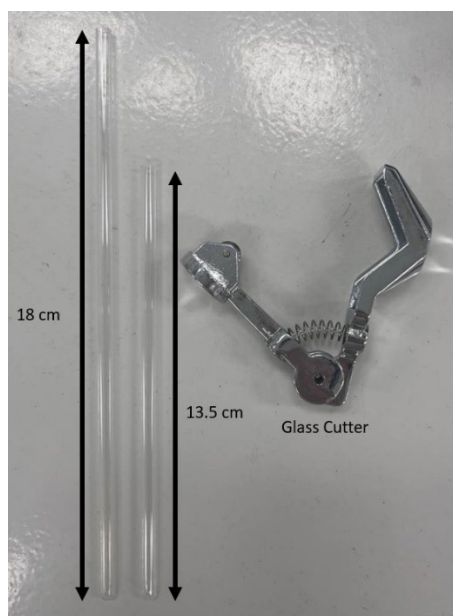

*Figure S 2. Comparison between the length of an original NMR tube (left) and the altered NMR tube (centre) when a glass cutter (right) is used to cut excess length to ensure that NMR tubes fit inside the OT-2 robot when loaded onto the NMR tube holder (Figure S1).*

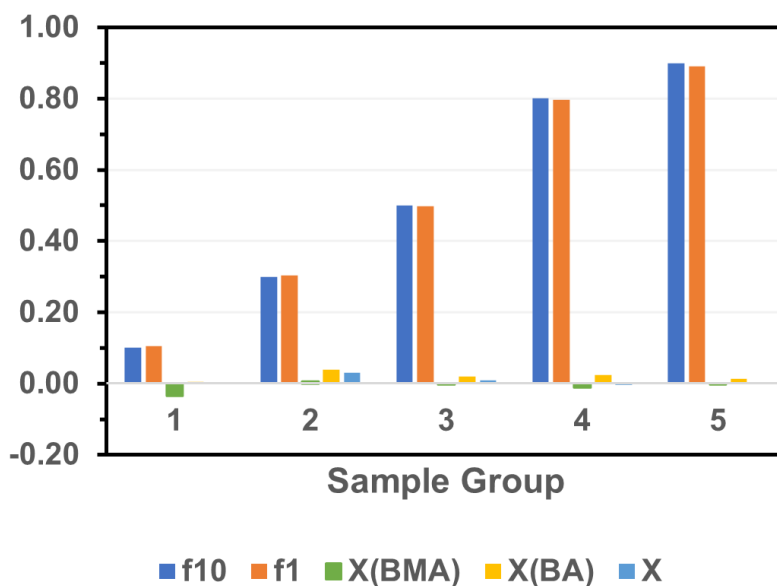

Figure S 3. Visual assessment of the evaporation of BMA and BA monomers from the reactor when exposed to 75 °C in a plate shaker. Monomers were mixed at the ratios and scale used for copolymerisation experiments as set out in Table 1, while no AIBN was added. The change in monomer fraction as well as conversion are negligible for all groups, indicating no evaporation of monomers.

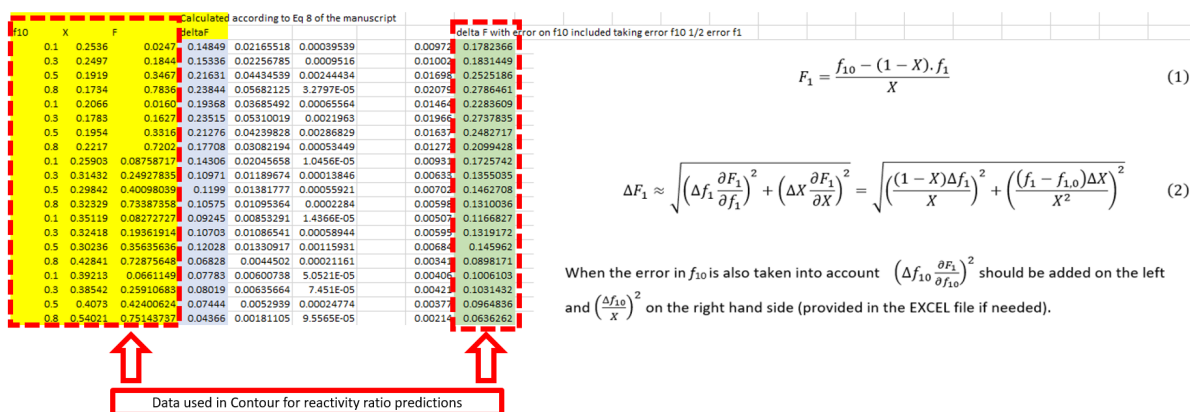

Figure S 4. Snapshot of the excel worksheet provided by the IUPAC working group which was used in this work to calculate input data for the Contour program. The highlighted columns are used as input data saved as a .csv file in Contour for the prediction of reactivity ratios.

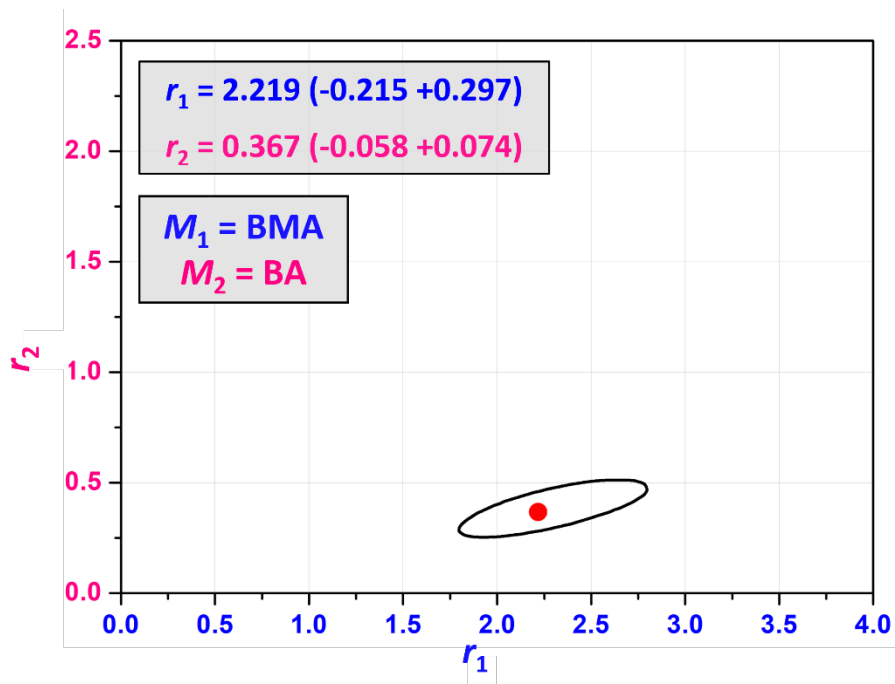

Figure S 5. 95% JCI plot obtained from Contour for BMA-BA with calculations conducted using given  $f_{10}$  values and an absolute error of 0.005 or 0.05 for  $X$  and  $f_i$ .

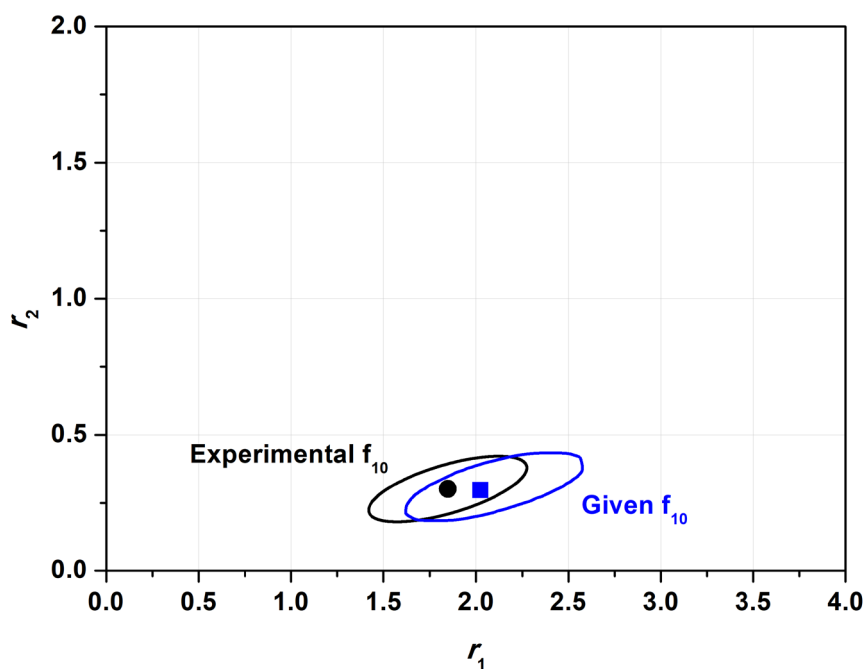

Figure S 6. Comparison between given and experimental  $f_{10}$  in the final prediction of reactivity ratios for BMA-BA in Contour for experiments shown in Table 1.

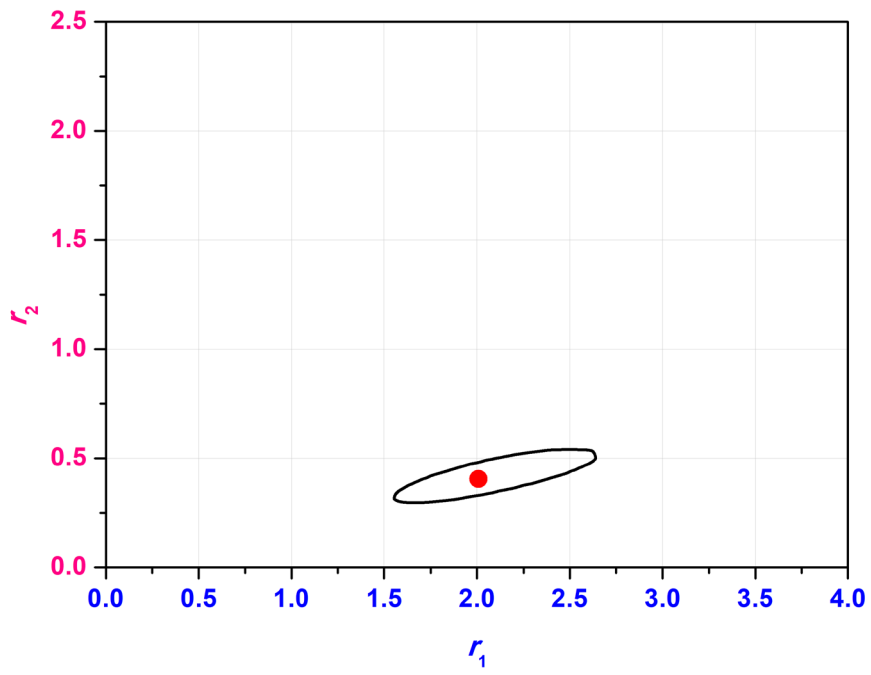

Figure S 7. 95% JCI for BMA-BA at 30 min.

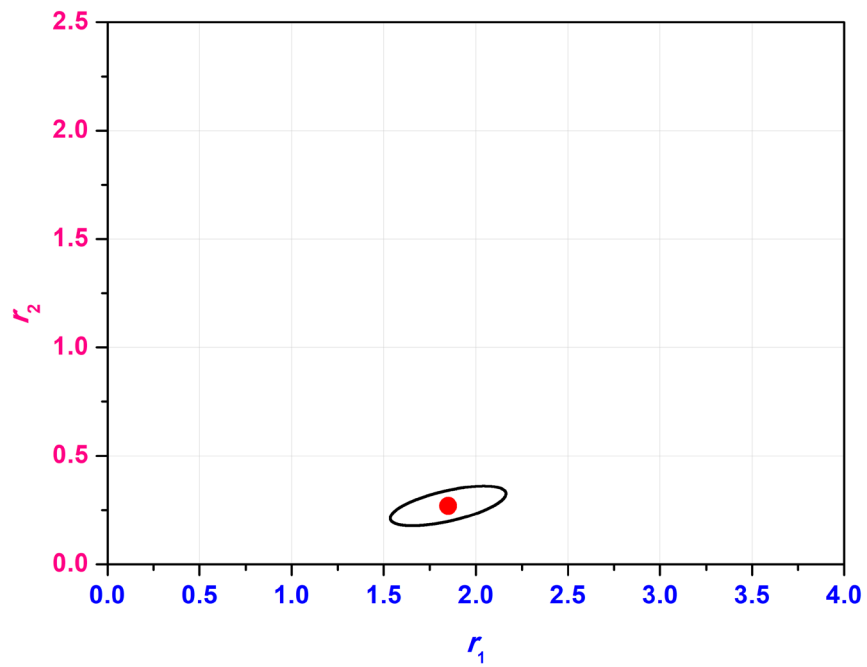

Figure S 8. 95% JCI for 45-datapoint set of BMA-BA at 2 h.

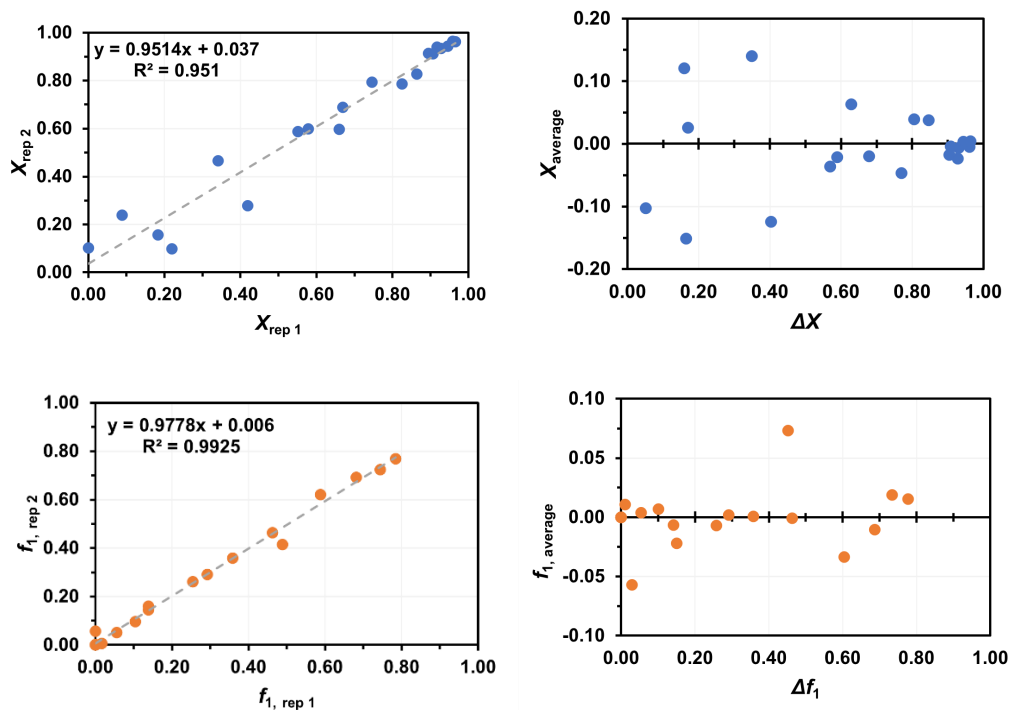

Figure S 9. Comparison of  $X$  and  $f_1$  values between replicate BMA-BA polymerisations in randomised wells. Each experiment was conducted under the same reaction conditions on different days, in different and re-randomised wells identified by their unique index. Reactions were conducted for 2 h at 75 °C. Left panels: scatter plots of  $X$  (top) and  $f_1$  (bottom) from rep 1 vs rep 2, with linear regression fits shown. Right panels: residual plots showing average  $X$  vs  $\Delta X$  (top) and average  $f_1$  vs  $\Delta f_1$  (bottom).

### 3. Supporting Tables

Table S 1. Repeatability results for the copolymerisations of BMA-BA. Each row represents consecutive experiments conducted under the same reaction conditions, but in different and re-randomised wells identified by their unique index. Reactions were conducted for 2 h at 75 °C, each on different days.

| Index <sub>1</sub> | Index <sub>2</sub> | AIBN wt.% <sup>a</sup> | f <sub>10</sub> <sup>b</sup> | f <sub>1,1</sub> <sup>c</sup> | f <sub>1,2</sub> <sup>c</sup> | X <sub>1</sub> <sup>d</sup> | X <sub>2</sub> <sup>d</sup> |
|--------------------|--------------------|------------------------|------------------------------|-------------------------------|-------------------------------|-----------------------------|-----------------------------|
| 44                 | 39                 | 0.0005                 | 0.1                          | 0.10                          | 0.10                          | 0.00                        | 0.10                        |
| 0                  | 23                 | 0.0005                 | 0.3                          | 0.25                          | 0.26                          | 0.22                        | 0.10                        |
| 39                 | 9                  | 0.0005                 | 0.5                          | 0.46                          | 0.46                          | 0.18                        | 0.16                        |
| 35                 | 7                  | 0.0005                 | 0.8                          | 0.78                          | 0.77                          | 0.09                        | 0.24                        |
| 45                 | 3                  | 0.0025                 | 0.1                          | 0.02                          | 0.01                          | 0.67                        | 0.69                        |
| 1                  | 25                 | 0.0025                 | 0.3                          | 0.14                          | 0.15                          | 0.55                        | 0.59                        |
| 40                 | 5                  | 0.0025                 | 0.5                          | 0.36                          | 0.36                          | 0.34                        | 0.47                        |
| 46                 | 40                 | 0.0025                 | 0.8                          | 0.74                          | 0.72                          | 0.42                        | 0.28                        |
| 29                 | 1                  | 0.005                  | 0.1                          | 0.00                          | 0.00                          | 0.89                        | 0.91                        |
| 11                 | 33                 | 0.005                  | 0.3                          | 0.06                          | 0.05                          | 0.75                        | 0.79                        |
| 34                 | 45                 | 0.005                  | 0.5                          | 0.29                          | 0.29                          | 0.58                        | 0.60                        |
| 26                 | 32                 | 0.005                  | 0.8                          | 0.68                          | 0.69                          | 0.66                        | 0.60                        |
| 42                 | 35                 | 0.01                   | 0.1                          | 0.00                          | 0.00                          | 0.92                        | 0.94                        |
| 17                 | 21                 | 0.01                   | 0.3                          | 0.00                          | 0.00                          | 0.93                        | 0.93                        |
| 33                 | 24                 | 0.01                   | 0.5                          | 0.14                          | 0.16                          | 0.86                        | 0.83                        |
| 8                  | 2                  | 0.01                   | 0.8                          | 0.59                          | 0.62                          | 0.83                        | 0.79                        |
| 38                 | 15                 | 0.02                   | 0.1                          | 0.00                          | 0.00                          | 0.97                        | 0.96                        |
| 31                 | 19                 | 0.02                   | 0.3                          | 0.00                          | 0.00                          | 0.96                        | 0.96                        |
| 32                 | 16                 | 0.02                   | 0.5                          | 0.00                          | 0.06                          | 0.95                        | 0.94                        |
| 22                 | 27                 | 0.02                   | 0.8                          | 0.49                          | 0.42                          | 0.91                        | 0.91                        |

<sup>a</sup> AIBN wt.% with respect to total monomer mass, <sup>b</sup> initial molar ratio of BMA as given in the reaction recipe, <sup>c</sup> molar ratio of BMA at t<sub>1</sub> calculated from NMR, <sup>d</sup> overall monomer conversion calculated from NMR.

Table S 2. Compiled data of all BMA-BA experiments. Different cell shades represent different experiment sets conducted on different days. Values are reported as obtained from NMR analysis, and negative datapoints are deleted from the final dataset used in Contour for reactivity ratio calculations.

| Variant | Reaction Time | AIBN wt% | $f_{10, \text{given}}$ | $f_1$ | $X$  | $F_1$ |
|---------|---------------|----------|------------------------|-------|------|-------|
| 01      | 2 h           | 0.05     | 0.10                   | 0.10  | 0.00 | -     |
| 02      | 2 h           | 0.05     | 0.30                   | 0.25  | 0.22 | 0.46  |
| 03      | 2 h           | 0.05     | 0.50                   | 0.46  | 0.18 | 0.67  |
| 04      | 2 h           | 0.05     | 0.80                   | 0.78  | 0.09 | 0.96  |
| 05      | 2 h           | 0.25     | 0.10                   | 0.02  | 0.67 | 0.14  |
| 06      | 2 h           | 0.25     | 0.30                   | 0.14  | 0.55 | 0.43  |
| 07      | 2 h           | 0.25     | 0.50                   | 0.36  | 0.34 | 0.77  |
| 08      | 2 h           | 0.25     | 0.80                   | 0.74  | 0.42 | 0.88  |
| 09      | 2 h           | 0.50     | 0.10                   | 0.00  | 0.89 | 0.11  |
| 10      | 2 h           | 0.50     | 0.30                   | 0.06  | 0.75 | 0.38  |
| 11      | 2 h           | 0.50     | 0.50                   | 0.29  | 0.58 | 0.65  |
| 12      | 2 h           | 0.50     | 0.80                   | 0.68  | 0.66 | 0.86  |
| 13      | 2 h           | 1.00     | 0.10                   | 0.00  | 0.92 | 0.11  |
| 14      | 2 h           | 1.00     | 0.30                   | 0.00  | 0.93 | 0.32  |
| 15      | 2 h           | 1.00     | 0.50                   | 0.14  | 0.86 | 0.56  |
| 16      | 2 h           | 1.00     | 0.80                   | 0.59  | 0.83 | 0.84  |
| 17      | 2 h           | 2.00     | 0.10                   | 0.00  | 0.97 | 0.10  |
| 18      | 2 h           | 2.00     | 0.30                   | 0.00  | 0.96 | 0.31  |
| 19      | 2 h           | 2.00     | 0.50                   | 0.00  | 0.95 | 0.54  |
| 20      | 2 h           | 2.00     | 0.80                   | 0.49  | 0.91 | 0.83  |
| 21      | 2 h           | 0.05     | 0.10                   | 0.10  | 0.10 | 0.13  |
| 22      | 2 h           | 0.05     | 0.30                   | 0.26  | 0.10 | 0.65  |

|    |        |      |      |      |      |      |
|----|--------|------|------|------|------|------|
| 23 | 2 h    | 0.05 | 0.50 | 0.46 | 0.16 | 0.70 |
| 24 | 2 h    | 0.05 | 0.80 | 0.77 | 0.24 | 0.90 |
| 25 | 2 h    | 0.25 | 0.10 | 0.01 | 0.69 | 0.14 |
| 26 | 2 h    | 0.25 | 0.30 | 0.15 | 0.59 | 0.41 |
| 27 | 2 h    | 0.25 | 0.50 | 0.36 | 0.47 | 0.66 |
| 28 | 2 h    | 0.25 | 0.80 | 0.72 | 0.28 | 1.00 |
| 29 | 2 h    | 0.50 | 0.10 | 0.00 | 0.91 | 0.11 |
| 30 | 2 h    | 0.50 | 0.30 | 0.05 | 0.79 | 0.36 |
| 31 | 2 h    | 0.50 | 0.50 | 0.29 | 0.60 | 0.64 |
| 32 | 2 h    | 0.50 | 0.80 | 0.69 | 0.60 | 0.87 |
| 33 | 2 h    | 1.00 | 0.10 | 0.00 | 0.94 | 0.11 |
| 34 | 2 h    | 1.00 | 0.30 | 0.00 | 0.93 | 0.32 |
| 35 | 2 h    | 1.00 | 0.50 | 0.16 | 0.83 | 0.57 |
| 36 | 2 h    | 1.00 | 0.80 | 0.62 | 0.79 | 0.85 |
| 37 | 2 h    | 2.00 | 0.10 | 0.00 | 0.96 | 0.10 |
| 38 | 2 h    | 2.00 | 0.30 | 0.00 | 0.96 | 0.31 |
| 39 | 2 h    | 2.00 | 0.50 | 0.06 | 0.94 | 0.53 |
| 40 | 2 h    | 2.00 | 0.80 | 0.42 | 0.91 | 0.84 |
| 41 | 30 min | 0.05 | 0.10 | 0.10 | 0.00 | -    |
| 42 | 30 min | 0.05 | 0.30 | 0.29 | 0.00 | -    |
| 43 | 30 min | 0.05 | 0.50 | 0.48 | 0.00 | -    |
| 44 | 30 min | 0.05 | 0.80 | 0.79 | 0.05 | 0.98 |
| 45 | 30 min | 0.25 | 0.10 | 0.09 | 0.08 | 0.21 |
| 46 | 30 min | 0.25 | 0.30 | 0.27 | 0.13 | 0.50 |
| 47 | 30 min | 0.25 | 0.50 | 0.46 | 0.13 | 0.78 |

|    |        |      |      |      |      |      |
|----|--------|------|------|------|------|------|
| 48 | 30 min | 0.25 | 0.80 | 0.77 | 0.16 | 0.95 |
| 49 | 30 min | 0.50 | 0.10 | 0.06 | 0.48 | 0.15 |
| 50 | 30 min | 0.50 | 0.30 | 0.25 | 0.29 | 0.43 |
| 51 | 30 min | 0.50 | 0.50 | 0.44 | 0.24 | 0.67 |
| 52 | 30 min | 0.50 | 0.80 | 0.77 | 0.25 | 0.90 |
| 53 | 30 min | 1.00 | 0.10 | 0.04 | 0.58 | 0.14 |
| 54 | 30 min | 1.00 | 0.30 | 0.17 | 0.45 | 0.46 |
| 55 | 30 min | 1.00 | 0.50 | 0.40 | 0.50 | 0.61 |
| 56 | 30 min | 1.00 | 0.80 | 0.76 | 0.32 | 0.89 |
| 57 | 30 min | 2.00 | 0.10 | 0.03 | 0.71 | 0.13 |
| 58 | 30 min | 2.00 | 0.30 | 0.13 | 0.61 | 0.40 |
| 59 | 30 min | 2.00 | 0.50 | 0.34 | 0.57 | 0.62 |
| 60 | 30 min | 2.00 | 0.80 | 0.74 | 0.45 | 0.87 |
| 61 | 2 h    | 0.05 | 0.20 | 0.20 | 0.00 | -    |
| 62 | 2 h    | 0.05 | 0.40 | 0.37 | 0.02 | -    |
| 63 | 2 h    | 0.05 | 0.60 | 0.56 | 0.16 | 0.80 |
| 64 | 2 h    | 0.05 | 0.70 | 0.69 | 0.04 | 0.90 |
| 65 | 2 h    | 0.05 | 0.90 | 0.90 | 0.07 | 0.94 |
| 66 | 2 h    | 0.25 | 0.20 | 0.05 | 0.69 | 0.27 |
| 67 | 2 h    | 0.25 | 0.40 | 0.21 | 0.60 | 0.53 |
| 68 | 2 h    | 0.25 | 0.60 | 0.48 | 0.47 | 0.74 |
| 69 | 2 h    | 0.25 | 0.70 | 0.59 | 0.52 | 0.80 |
| 70 | 2 h    | 0.25 | 0.90 | 0.88 | 0.48 | 0.92 |
| 71 | 2 h    | 0.50 | 0.20 | 0.03 | 0.85 | 0.23 |
| 72 | 2 h    | 0.50 | 0.40 | 0.11 | 0.71 | 0.52 |

|    |     |      |      |      |      |      |
|----|-----|------|------|------|------|------|
| 73 | 2 h | 0.50 | 0.60 | 0.38 | 0.70 | 0.70 |
| 74 | 2 h | 0.50 | 0.70 | 0.55 | 0.66 | 0.78 |
| 75 | 2 h | 0.50 | 0.90 | 0.85 | 0.68 | 0.92 |
| 76 | 2 h | 1.00 | 0.20 | 0.00 | 0.92 | 0.22 |
| 77 | 2 h | 1.00 | 0.40 | 0.00 | 0.90 | 0.45 |
| 78 | 2 h | 1.00 | 0.60 | 0.19 | 0.90 | 0.64 |
| 79 | 2 h | 1.00 | 0.70 | 0.45 | 0.77 | 0.78 |
| 80 | 2 h | 1.00 | 0.90 | 0.80 | 0.75 | 0.93 |
| 81 | 2 h | 2.00 | 0.20 | 0.00 | 0.98 | 0.20 |
| 82 | 2 h | 2.00 | 0.40 | 0.00 | 0.96 | 0.42 |
| 83 | 2 h | 2.00 | 0.60 | 0.16 | 0.94 | 0.63 |
| 84 | 2 h | 2.00 | 0.70 | 0.15 | 0.94 | 0.74 |
| 85 | 2 h | 2.00 | 0.90 | 0.92 | 0.92 | 0.90 |

Table S 3 Swapping the indexing of monomers in BMA-BA case with BA assigned as  $M_1$  (to be compared with data in Table I).

| Variant | AIBN wt% | $f_{10, \text{given}}$ | $f_{10, \text{experimental}}$ | $f_1$ | $X$  | $F_1$ |
|---------|----------|------------------------|-------------------------------|-------|------|-------|
| 01      | 0.05     | 0.90                   | 0.91                          | 0.90  | 0.10 | 0.87  |
| 02      | 0.05     | 0.70                   | 0.71                          | 0.74  | 0.10 | 0.35  |
| 03      | 0.05     | 0.50                   | 0.52                          | 0.54  | 0.16 | 0.30  |
| 04      | 0.05     | 0.20                   | 0.22                          | 0.23  | 0.24 | 0.10  |
| 05      | 0.25     | 0.90                   | 0.90                          | 0.99  | 0.69 | 0.86  |
| 06      | 0.25     | 0.70                   | 0.73                          | 0.85  | 0.59 | 0.59  |
| 07      | 0.25     | 0.50                   | 0.51                          | 0.64  | 0.47 | 0.34  |
| 08      | 0.25     | 0.20                   | 0.22                          | 0.28  | 0.28 | 0.00  |
| 09      | 0.50     | 0.90                   | 0.91                          | 1.00  | 0.91 | 0.89  |
| 10      | 0.50     | 0.70                   | 0.71                          | 0.95  | 0.79 | 0.64  |
| 11      | 0.50     | 0.50                   | 0.50                          | 0.71  | 0.60 | 0.36  |
| 12      | 0.50     | 0.20                   | 0.22                          | 0.31  | 0.60 | 0.13  |
| 13      | 1.00     | 0.90                   | 0.90                          | 1.00  | 0.94 | 0.89  |
| 14      | 1.00     | 0.70                   | 0.70                          | 1.00  | 0.93 | 0.68  |
| 15      | 1.00     | 0.50                   | 0.51                          | 0.84  | 0.83 | 0.43  |
| 16      | 1.00     | 0.20                   | 0.20                          | 0.38  | 0.79 | 0.15  |
| 17      | 2.00     | 0.90                   | 0.90                          | 1.00  | 0.96 | 0.90  |
| 18      | 2.00     | 0.70                   | 0.70                          | 1.00  | 0.96 | 0.69  |
| 19      | 2.00     | 0.50                   | 0.51                          | 0.94  | 0.94 | 0.47  |
| 20      | 2.00     | 0.20                   | 0.20                          | 0.58  | 0.91 | 0.16  |

Table S 4. List of experiments designed for the copolymerization of BMA ( $M_1$ ) and St ( $M_2$ ) at different BMA molar ratios ( $f_{10}$ ) and AIBN wt.%. All experiments are performed at 70 °C for 2 h.

| Variant | AIBN wt% | $f_{10, \text{given}}$ | $f_{10, \text{experimental}}$ | $f_1$ | $X$  | $F_1$ |
|---------|----------|------------------------|-------------------------------|-------|------|-------|
| 01      | 0.05     | 0.10                   | 0.11                          | 0.11  | 0.07 | -     |
| 02      | 0.05     | 0.30                   | 0.29                          | 0.31  | 0.13 | 0.28  |
| 03      | 0.05     | 0.50                   | 0.48                          | 0.50  | 0.08 | 0.47  |
| 04      | 0.05     | 0.80                   | 0.78                          | 0.80  | 0.19 | 0.79  |
| 05      | 0.25     | 0.10                   | 0.10                          | 0.10  | 0.20 | 0.09  |
| 06      | 0.25     | 0.30                   | 0.29                          | 0.30  | 0.25 | 0.29  |
| 07      | 0.25     | 0.50                   | 0.49                          | 0.50  | 0.26 | 0.49  |
| 08      | 0.25     | 0.80                   | 0.81                          | 0.83  | 0.27 | 0.72  |
| 09      | 0.50     | 0.10                   | 0.10                          | 0.10  | 0.31 | 0.11  |
| 10      | 0.50     | 0.30                   | 0.30                          | 0.30  | 0.33 | 0.30  |
| 11      | 0.50     | 0.50                   | 0.50                          | 0.51  | 0.37 | 0.49  |
| 12      | 0.50     | 0.80                   | 0.80                          | 0.83  | 0.35 | 0.75  |
| 13      | 1.00     | 0.10                   | 0.10                          | 0.08  | 0.49 | 0.13  |
| 14      | 1.00     | 0.30                   | 0.30                          | 0.30  | 0.27 | 0.31  |
| 15      | 1.00     | 0.50                   | 0.50                          | 0.51  | 0.38 | 0.49  |
| 16      | 1.00     | 0.80                   | 0.79                          | 0.84  | 0.46 | 0.76  |
| 17      | 2.00     | 0.10                   | 0.10                          | 0.10  | 0.28 | 0.11  |
| 18      | 2.00     | 0.30                   | 0.30                          | 0.29  | 0.36 | 0.32  |
| 19      | 2.00     | 0.50                   | 0.49                          | 0.51  | 0.55 | 0.49  |
| 20      | 2.00     | 0.80                   | 0.80                          | 0.86  | 0.57 | 0.76  |

Table S 5. List of experiments designed for the copolymerization of St ( $M_1$ ) and BA ( $M_2$ ) at different St molar ratios ( $f_{10}$ ) and AIBN wt.%. All experiments are performed at 70 °C for 2 h.

| Variant | AIBN wt% | $f_{10, \text{given}}$ | $f_{10, \text{experimental}}$ | $f_1$ | $X$  | $F_1$ |
|---------|----------|------------------------|-------------------------------|-------|------|-------|
| 01      | 0.05     | 0.10                   | 0.08                          | 0.08  | 0.30 | 0.14  |
| 02      | 0.05     | 0.30                   | 0.26                          | 0.27  | 0.29 | 0.34  |
| 03      | 0.05     | 0.50                   | 0.45                          | 0.46  | 0.25 | 0.49  |
| 04      | 0.05     | 0.80                   | 0.75                          | 0.74  | 0.28 | 0.87  |
| 05      | 0.25     | 0.10                   | 0.08                          | 0.05  | 0.32 | 0.22  |
| 06      | 0.25     | 0.30                   | 0.27                          | 0.23  | 0.29 | 0.43  |
| 07      | 0.25     | 0.50                   | 0.47                          | 0.43  | 0.34 | 0.61  |
| 08      | 0.25     | 0.80                   | 0.76                          | 0.73  | 0.18 | 0.92  |
| 09      | 0.50     | 0.10                   | 0.07                          | 0.03  | 0.66 | 0.19  |
| 10      | 0.50     | 0.30                   | 0.25                          | 0.20  | 0.39 | 0.47  |
| 11      | 0.50     | 0.50                   | 0.46                          | 0.42  | 0.44 | 0.60  |
| 12      | 0.50     | 0.80                   | 0.75                          | 0.74  | 0.41 | 0.85  |
| 13      | 1.00     | 0.10                   | 0.07                          | 0.06  | 0.64 | 0.14  |
| 14      | 1.00     | 0.30                   | 0.26                          | 0.15  | 0.50 | 0.41  |
| 15      | 1.00     | 0.50                   | 0.46                          | 0.40  | 0.45 | 0.59  |
| 16      | 1.00     | 0.80                   | 0.76                          | 0.73  | 0.36 | 0.84  |
| 17      | 2.00     | 0.10                   | 0.05                          | 0.05  | 0.94 | 0.11  |
| 18      | 2.00     | 0.30                   | 0.27                          | 0.09  | 0.64 | 0.41  |
| 19      | 2.00     | 0.50                   | 0.47                          | 0.36  | 0.51 | 0.60  |
| 20      | 2.00     | 0.80                   | 0.76                          | 0.74  | 0.42 | 0.88  |

Table S 6. List of experiments designed for the copolymerization of St ( $M_1$ ) and MMA ( $M_2$ ) at different St molar ratios ( $f_{10}$ ) and AIBN wt.%. All experiments are performed at 70 °C for 2 h.

| Variant | AIBN wt% | $f_{10, \text{given}}$ | $f_{10, \text{experimental}}$ | $f_1$ | $X$  | $F_1$ |
|---------|----------|------------------------|-------------------------------|-------|------|-------|
| 01      | 0.05     | 0.10                   | 0.11                          | 0.09  | 0.14 | 0.25  |
| 02      | 0.05     | 0.30                   | 0.31                          | 0.29  | 0.13 | 0.32  |
| 03      | 0.05     | 0.50                   | 0.51                          | 0.50  | 0.18 | 0.58  |
| 04      | 0.05     | 0.80                   | 0.80                          | 0.80  | 0.02 | 0.76  |
| 05      | 0.25     | 0.10                   | 0.10                          | 0.05  | 0.29 | 0.18  |
| 06      | 0.25     | 0.30                   | 0.30                          | 0.25  | 0.28 | 0.40  |
| 07      | 0.25     | 0.50                   | 0.49                          | 0.47  | 0.23 | 0.59  |
| 08      | 0.25     | 0.80                   | 0.80                          | 0.78  | 0.16 | 0.72  |
| 09      | 0.50     | 0.10                   | 0.11                          | 0.04  | 0.39 | 0.22  |
| 10      | 0.50     | 0.30                   | 0.29                          | 0.23  | 0.28 | 0.39  |
| 11      | 0.50     | 0.50                   | 0.50                          | 0.46  | 0.27 | 0.56  |
| 12      | 0.50     | 0.80                   | 0.80                          | 0.78  | 0.24 | 0.76  |
| 13      | 1.00     | 0.10                   | 0.11                          | 0.00  | 0.70 | 0.14  |
| 14      | 1.00     | 0.30                   | 0.29                          | 0.19  | 0.50 | 0.38  |
| 15      | 1.00     | 0.50                   | 0.50                          | 0.45  | 0.34 | 0.56  |
| 16      | 1.00     | 0.80                   | 0.80                          | 0.78  | 0.31 | 0.77  |
| 17      | 2.00     | 0.10                   | 0.10                          | 0.00  | 0.94 | 0.14  |
| 18      | 2.00     | 0.30                   | 0.30                          | 0.14  | 0.59 | 0.36  |
| 19      | 2.00     | 0.50                   | 0.49                          | 0.41  | 0.46 | 0.46  |
| 20      | 2.00     | 0.80                   | 0.80                          | 0.75  | 0.36 | 0.75  |

Table S 7. List of experiments designed for the copolymerization of GMA ( $M_1$ ) and BA ( $M_2$ ) at different GMA molar ratios ( $f_{10}$ ) and AIBN wt.%. All experiments are performed at 70 °C for 2 h.

| Variant | AIBN wt% | $f_{10, \text{given}}$ | $f_{10, \text{experimental}}$ | $f_1$ | $X$  | $F_1$ |
|---------|----------|------------------------|-------------------------------|-------|------|-------|
| 01      | 0.05     | 0.10                   | 0.10                          | 0.07  | 0.29 | 0.25  |
| 02      | 0.05     | 0.30                   | 0.32                          | 0.29  | 0.20 | 0.47  |
| 03      | 0.05     | 0.50                   | 0.52                          | 0.45  | 0.31 | 0.62  |
| 04      | 0.05     | 0.80                   | 0.82                          | 0.80  | 0.45 | 0.82  |
| 05      | 0.25     | 0.10                   | 0.10                          | 0.02  | 0.84 | 0.17  |
| 06      | 0.25     | 0.30                   | 0.31                          | 0.19  | 0.63 | 0.51  |
| 07      | 0.25     | 0.50                   | 0.53                          | 0.40  | 0.72 | 0.66  |
| 08      | 0.25     | 0.80                   | 0.82                          | 0.74  | 0.58 | 0.88  |
| 09      | 0.50     | 0.10                   | 0.10                          | 0.01  | 0.81 | 0.26  |
| 10      | 0.50     | 0.30                   | 0.31                          | 0.14  | 0.89 | 0.47  |
| 11      | 0.50     | 0.50                   | 0.54                          | 0.36  | 0.88 | 0.64  |
| 12      | 0.50     | 0.80                   | 0.83                          | 0.73  | 0.89 | 0.95  |
| 13      | 1.00     | 0.10                   | 0.11                          | 0.06  | 0.96 | 0.11  |
| 14      | 1.00     | 0.30                   | 0.32                          | 0.07  | 0.95 | 0.38  |
| 15      | 1.00     | 0.50                   | 0.55                          | 0.28  | 0.97 | 0.63  |
| 16      | 1.00     | 0.80                   | 0.81                          | 0.70  | 0.96 | 0.86  |
| 17      | 2.00     | 0.10                   | 0.10                          | 0.00  | 0.95 | 0.11  |
| 18      | 2.00     | 0.30                   | 0.32                          | 0.05  | 0.97 | 0.36  |
| 19      | 2.00     | 0.50                   | 0.53                          | 0.20  | 0.97 | 0.59  |
| 20      | 2.00     | 0.80                   | 0.83                          | 0.62  | 0.97 | 0.85  |

Table S 8. List of experiments designed for the copolymerization of GMA ( $M_1$ ) and St ( $M_2$ ) at different GMA molar ratios ( $f_{10}$ ) and AIBN wt.%. All experiments are performed at 70 °C for 2 h.

| Variant | AIBN wt% | $f_{10, \text{given}}$ | $f_{10, \text{experimental}}$ | $f_1$ | $X$  | $F_1$ |
|---------|----------|------------------------|-------------------------------|-------|------|-------|
| 01      | 0.05     | 0.10                   | 0.13                          | 0.13  | 0.05 | 0.26  |
| 02      | 0.05     | 0.30                   | 0.37                          | 0.34  | 0.14 | 0.55  |
| 03      | 0.05     | 0.50                   | 0.56                          | 0.53  | 0.17 | 0.68  |
| 04      | 0.05     | 0.80                   | 0.84                          | 0.84  | 0.22 | 0.87  |
| 05      | 0.25     | 0.10                   | 0.16                          | 0.14  | 0.17 | 0.26  |
| 06      | 0.25     | 0.30                   | 0.40                          | 0.36  | 0.20 | 0.53  |
| 07      | 0.25     | 0.50                   | 0.58                          | 0.56  | 0.32 | 0.63  |
| 08      | 0.25     | 0.80                   | 0.86                          | 0.91  | 0.61 | 0.82  |
| 09      | 0.50     | 0.10                   | 0.15                          | 0.13  | 0.20 | 0.24  |
| 10      | 0.50     | 0.30                   | 0.37                          | 0.33  | 0.25 | 0.48  |
| 11      | 0.50     | 0.50                   | 0.62                          | 0.57  | 0.42 | 0.69  |
| 12      | 0.50     | 0.80                   | 0.86                          | 0.90  | 0.56 | 0.84  |
| 13      | 1.00     | 0.10                   | 0.14                          | 0.11  | 0.29 | 0.21  |
| 14      | 1.00     | 0.30                   | 0.37                          | 0.32  | 0.34 | 0.47  |
| 15      | 1.00     | 0.50                   | 0.56                          | 0.53  | 0.44 | 0.60  |
| 16      | 1.00     | 0.80                   | 0.85                          | 0.89  | 0.73 | 0.83  |
| 17      | 2.00     | 0.10                   | 0.14                          | 0.10  | 0.33 | 0.22  |
| 18      | 2.00     | 0.30                   | 0.37                          | 0.31  | 0.44 | 0.45  |
| 19      | 2.00     | 0.50                   | 0.59                          | 0.56  | 0.66 | 0.60  |
| 20      | 2.00     | 0.80                   | 0.84                          | 1.00  | 0.94 | 0.83  |

Table S 9. Some of the copolymerization reactivity ratio values reported in literature for monomer pairs studied in the present work. Data is obtained from the online CoPolDB website<sup>21</sup>.

| Monomer Pair                            | $r_1$ | $r_2$  | Reaction temperature               | Solvent       | Reference |
|-----------------------------------------|-------|--------|------------------------------------|---------------|-----------|
| $M_1 = \text{BMA}$                      | 2.22  | 0.37   | 70                                 | Toluene       | This work |
| $M_2 = \text{BA}$                       | 2.2   | 0.3    | 50                                 | Ethyl alcohol | [3]       |
| $M_1 = \text{BMA}$<br>$M_2 = \text{St}$ | 0.58  | 0.73   | 70                                 | Toluene       | This work |
|                                         | 0.31  | 0.56   | 60                                 | - (bulk)      | [4]       |
|                                         | 2.52  | -0.05  | 30                                 | - (bulk)      | [5]       |
|                                         | 0.59  | 0.74   | RT (plasma induced polymerization) | -             | [6]       |
| $M_1 = \text{St}$<br>$M_2 = \text{BA}$  | 1.23  | 0.32   | 70                                 | Toluene       | This work |
|                                         | 0.79  | 0.25   | 110                                | - (bulk)      | [7]       |
|                                         | 0.79  | 0.34   | 150                                | - (bulk)      | [7]       |
|                                         | 0.75  | 0.38   | 170                                | - (bulk)      | [7]       |
|                                         | 1.23  | -0.106 | 25                                 | - (bulk)      | [8]       |
|                                         | 0.44  | 0.29   | 25                                 | - (bulk)      | [9]       |
|                                         | 1.03  | 0.34   | 60                                 | Benzene       | [10]      |
|                                         | 0.76  | 0.15   | 60                                 | - (bulk)      | [10]      |
|                                         | 0.8   | 0.15   | 60                                 | - (bulk)      | [11]      |
|                                         | 0.97  | 0.14   | 60                                 | Benzene       | [11]      |
|                                         | 0.63  | 0.08   | 60                                 | THF           | [11]      |
| 0.698                                   | 0.164 | 50     | - (bulk)                           | [12]          |           |
| $M_1 = \text{St}$<br>$M_2 = \text{MMA}$ | 0.46  | 0.58   | 70                                 | Toluene       | This work |
|                                         | 0.52  | 0.46   | 60                                 | - (bulk)      | [13]      |
|                                         | 0.59  | 0.54   | 130                                | - (bulk)      | [13]      |
|                                         | 0.396 | 0.22   | 15                                 | - (bulk)      | [14]      |
|                                         | 0.52  | 0.47   | 60                                 | Benzene       | [15]      |
|                                         | 0.48  | 0.50   | 60                                 | Chlorobenzene | [15]      |
|                                         | 0.38  | 0.62   | 60                                 | Benzonitrile  | [15]      |
|                                         | 0.275 | 0.314  | 60                                 | - (bulk)      | [16]      |
| $M_1 = \text{GMA}$                      | 1.76  | 0.24   | 70                                 | Toluene       | This work |
| $M_2 = \text{BA}$                       | 2.16  | 0.083  | 60                                 | - (bulk)      | [17]      |
| $M_1 = \text{GMA}$<br>$M_2 = \text{St}$ | 0.69  | 0.32   | 70                                 | Toluene       | This work |
|                                         | 0.17  | 0.60   | 60                                 | - (bulk)      | [18]      |
|                                         | 0.63  | 0.34   | 65                                 | - (bulk)      | [19]      |
|                                         | 0.65  | 0.36   | 60                                 | - (bulk)      | [20]      |

Table S 10. Composition data for BMA-BA mixtures heated at 75°C. Comparison of feed composition ( $f_{10}$ ,  $f_1$ ) with experimentally determined monomer conversions ( $X_{BMA}$ ,  $X_{BA}$ ,  $X$ ) across five groups. The data indicates negligible evaporative loss of monomers, as feed and experimental compositions remain equivalent and monomer conversion is negligible within experimental error. Negative conversion results are retained for transparency regardless of their physical nonsensicality and can be attributed to experimental error in NMR.

| Group | $f_{10}^a$ | $f_1^b$ | $X_{BMA}^c$ | $X_{BA}^c$ | $X^c$ |
|-------|------------|---------|-------------|------------|-------|
| 1     | 0.10       | 0.11    | -0.04       | 0.00       | 0.00  |
| 2     | 0.30       | 0.30    | 0.01        | 0.04       | 0.03  |
| 3     | 0.50       | 0.50    | 0.00        | 0.02       | 0.01  |
| 4     | 0.80       | 0.80    | -0.01       | 0.02       | 0.00  |
| 5     | 0.90       | 0.89    | 0.00        | 0.01       | 0.00  |

<sup>a</sup> initial molar ratio of BMA as given in the reaction recipe, <sup>b</sup> molar ratio of BMA at  $t_1$  calculated from NMR, <sup>c</sup> overall monomer conversion calculated from NMR.

Table S 11. Statistical comparison of  $r_1$  and  $r_2$  values measured in this work compared to literature based on JCI. Joint significance estimate:  $\chi^2(2) = z_{r_1}^2 + z_{r_2}^2$  vs. chi-squared distribution (2 d.f.); ns =  $p > 0.05$ , \*  $p \leq 0.05$ , \*\*  $p \leq 0.01$ , \*\*\*  $p \leq 0.001$ .  $z$  values are estimated from JCIs. Measured values: 75 °C, toluene, free-radical solution polymerisation (NLLS fit).

| Monomer System | $r_1$ (This Work) | 95% CI ( $r_1$ ) | $r_2$ (This Work) | 95% CI ( $r_2$ ) | Ref.    | Lit. Conditions    | $r_1$ (Lit.) / $r_2$ (Lit.) | Joint Significance |
|----------------|-------------------|------------------|-------------------|------------------|---------|--------------------|-----------------------------|--------------------|
| BMA / BA       | 2.219             | [2.004, 2.516]   | 0.367             | [0.309, 0.441]   | [3]     | 50 °C, EtOH        | 2.20 / 0.30                 | ns                 |
| BMA / St       | 0.578             | [0.539, 0.617]   | 0.733             | [0.680, 0.786]   | [4]     | 60 °C, bulk        | 0.31 / 0.56                 | ***                |
| BMA / St       |                   |                  |                   |                  | [5]     | 30 °C, bulk        | 2.52 / -0.05 <sup>a</sup>   | ***                |
|                |                   |                  |                   |                  | [6]     | RT, plasma         | 0.59 / 0.74                 | ns                 |
|                |                   |                  |                   |                  | [7–12]  | 60–170 °C, various | 0.44–1.23 / 0.08–0.38       | *** <sup>b</sup>   |
| St / MMA       | 0.462             | [0.419, 0.505]   | 0.582             | [0.549, 0.615]   | [13–16] | 15–130 °C, various | 0.275–0.59 / 0.22–0.62      | *** <sup>c</sup>   |
| GMA / BA       | 1.765             | [1.570, 2.025]   | 0.239             | [0.187, 0.302]   | [17]    | 60 °C, bulk        | 2.16 / 0.083                | ***                |
| GMA / St       | 0.691             | [0.624, 0.767]   | 0.324             | [0.273, 0.388]   | [18]    | 60 °C, bulk        | 0.17 / 0.60                 | ***                |
| GMA / St       |                   |                  |                   |                  | [19]    | 65 °C, bulk        | 0.63 / 0.34                 | ns                 |
|                |                   |                  |                   |                  | [20]    | 60 °C, bulk        | 0.65 / 0.36                 | ns                 |

<sup>a</sup>  $r_2 = -0.05$  is physically unreasonable. <sup>b</sup> St/BA: 9 literature entries compared; all but one ref. [10] (60 °C, benzene) are statistically significant. <sup>c</sup> St/MMA: 7 literature entries compared; all are statistically significant.

#### 4. Procedure to use Python to remotely control the OT-2 robot and run copolymerisation experiments

File paths used in the codes provided are user-specific and must be updated accordingly before use.

**Step 1:** Establishing an SSH connection between the computer and the robot.

We followed the instructions below provided by Opentrons to establish an SSH connection and acquired the SSH key pair.

1. <https://support.opentrons.com/s/article/Setting-up-SSH-access-to-your-OT-2>

2. <https://support.opentrons.com/s/article/Connecting-to-your-OT-2-with-SSH>

This SSH link was used for a direct connection to the OT-2 robot to transfer files (Secure Copy Protocol-SCP) and execute protocols from Pycharm.

**Step 2:** Preparing custom labware using the Opentrons Custom Labware Creator tool. We have provided all the custom labware we have used in this work, and the protocol can be adjusted/expanded to cover other labware.

**Step 3:** Loading custom labware files onto the Opentrons app, then running the “Labware Offset Calculator” protocol on the Opentrons app (protocol file provided) and getting the calibration offset values, which were copy-pasted into the Copolymerisation-Part A and B protocols (both protocols provided).

**Step 4:** Running the “OT-2-Control-via-SSH” file on Pycharm (Community edition) to load the custom labware onto the robot’s directory using the `run_subprocess_labware` function (need to add this in the block of code that starts with `if __name__ == “__main__”`.)

Then, running the same protocol, now replacing the `run_subprocess_labware` function with the `run_subprocess` (to transfer files via SCP) and `run_execute` (to run the OT-2 protocol) (this is the default layout of the python file provided).

When the OT-2-Control-via-SSH protocol is run, the computer establishes an SSH connection to the robot, uploads the csv file containing reaction volumes (prepared beforehand), and prompts the user to select a python protocol. First, “Copolymerisation-PartA” must be selected in order for the robot to prepare reaction mixtures and  $t_0$  NMR samples. After completion of Part A, the prepared well-plate must be sealed using aluminium foil, then placed in the heater shaker for polymerisation. At this stage the Python protocol in Pycharm will prompt the user to respond to this question: "Continue with the experiments?" When the polymerisation reaction is completed and the well-plate is placed back onto

the robot's deck, the user must type "yes" in the terminal and load "Copolymerisation-PartB" to continue on with the preparation of  $t_1$  samples.

GitHub repository containing all the required files:

<https://github.com/PRDMonash/A-Robotic-Approach-to-Polymerization-Kinetics-A-Case-Study-on-Copolymerization-Parameter-Estimation.git>

All experimental data are available at the following repository:

<https://doi.org/10.26180/32015067>)

### Comparison of simulated copolymer composition curves from reactivity ratios measured via 96-well plate and 48-well reactor formats

The copolymer composition plots were generated in Python (NumPy/Matplotlib) by evaluating the Mayo-Lewis equation on an evenly spaced feed composition grid  $f_1 \in [0,1]$  with 200 points, using the best fit reactivity ratios  $(r_1, r_2)$  calculated for each reactor / well-plate parameter set. For each system and condition, a central curve is plotted from the best fit values, and an uncertainty band is obtained by re-evaluating the equation at  $(r_1 \pm \Delta r_1, r_2 \pm \Delta r_2)$  using the confidence intervals obtained via Contour. The ideal random copolymerisation line  $F_1 = f_1$  is included for reference. To quantify the similarity between the two curves being compared, 8000 Monte Carlo samples of  $(r_1, r_2)$  are drawn for each condition from a two-piece normal distribution centred at the best-fit values with the reported lower/upper errors as the left/right standard deviations, the corresponding ensembles of  $F_1$  curves are computed over the same grid, and at each  $f_1$  point the overlap coefficient between the two empirical  $F_1$  distributions is estimated via histograms (60 bins) and then averaged over  $f_1$  to give a single similarity score printed on the plot. Trivial boundary points where all curves converge to 0 or 1 are removed prior to binning to prevent overinflation of similarity scores. All plots are exported as high-resolution PNG files. The relevant Python code is included on the open-source GitHub repository for reference.

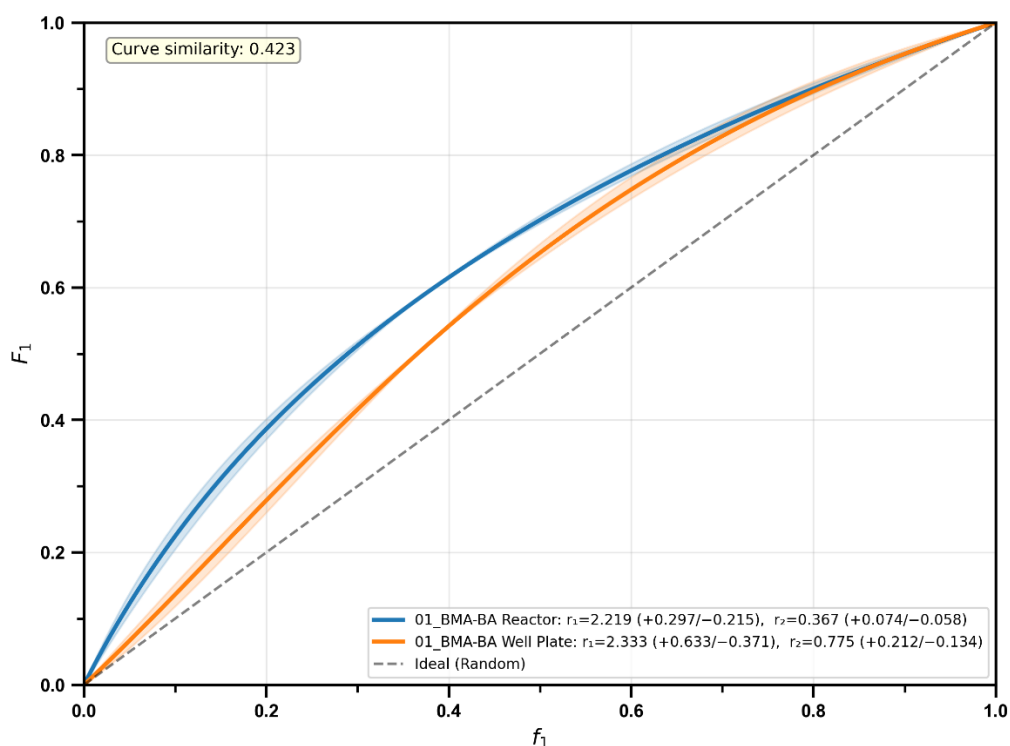

Figure S 10. Comparison of Copolymer Composition Curves for BMA-BA. The Mayo-Lewis copolymer composition curves from BMA-BA reactivity ratios derived using the reactor (blue solid line) and well plate (orange solid line) formats.

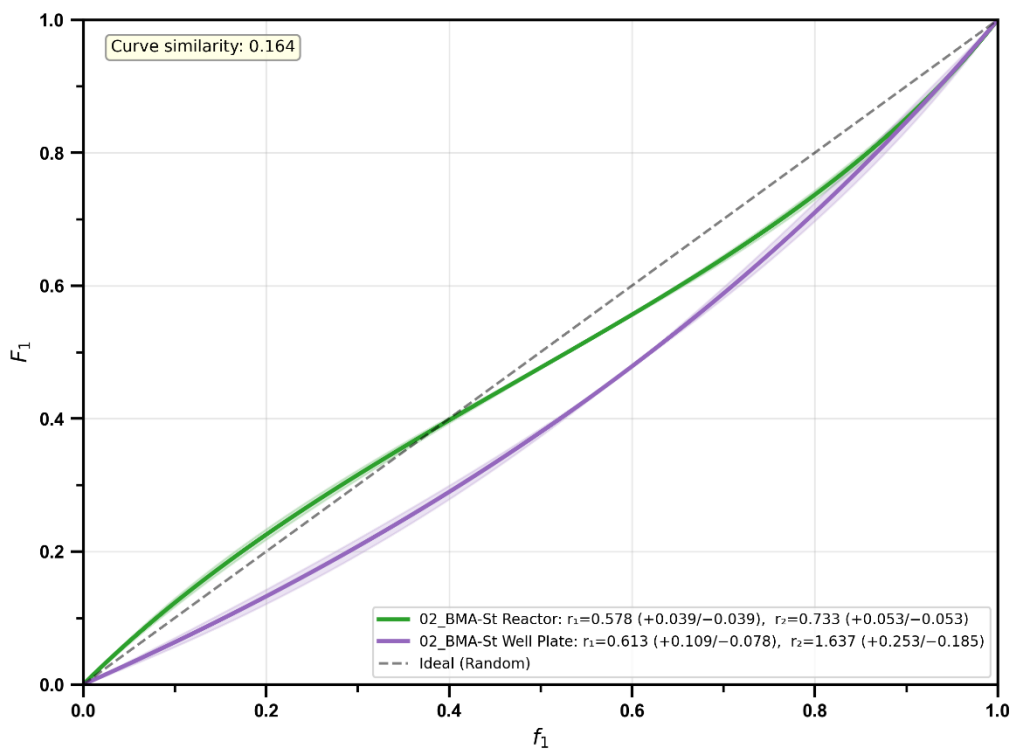

Figure S 11. Comparison of Copolymer Composition Curves for BMA-St. The Mayo-Lewis copolymer composition curves from BMA-St reactivity ratios derived using the reactor (green solid line) and well plate (purple solid line) formats.

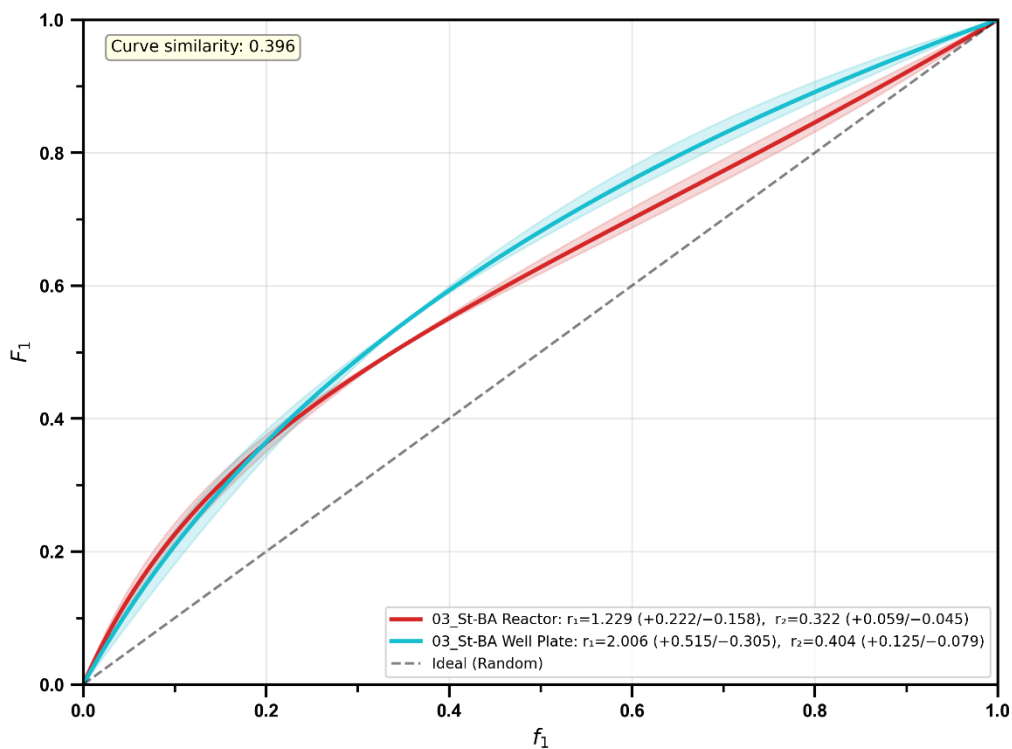

Figure S 12. Comparison of Copolymer Composition Curves for St-BA. The Mayo-Lewis copolymer composition curves from St-BA reactivity ratios derived using the reactor (red solid line) and well plate (teal solid line) formats.

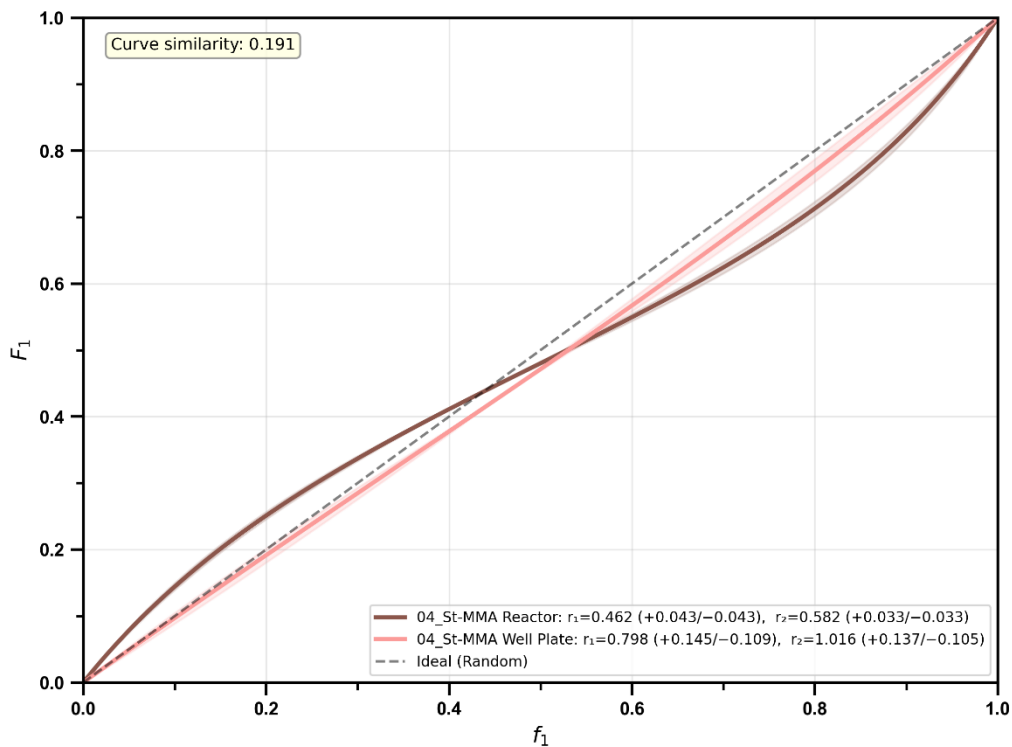

Figure S 13. Comparison of Copolymer Composition Curves for St-MMA. The Mayo-Lewis copolymer composition curves from St-MMA reactivity ratios derived using the reactor (brown solid line) and well plate (pink solid line) formats.

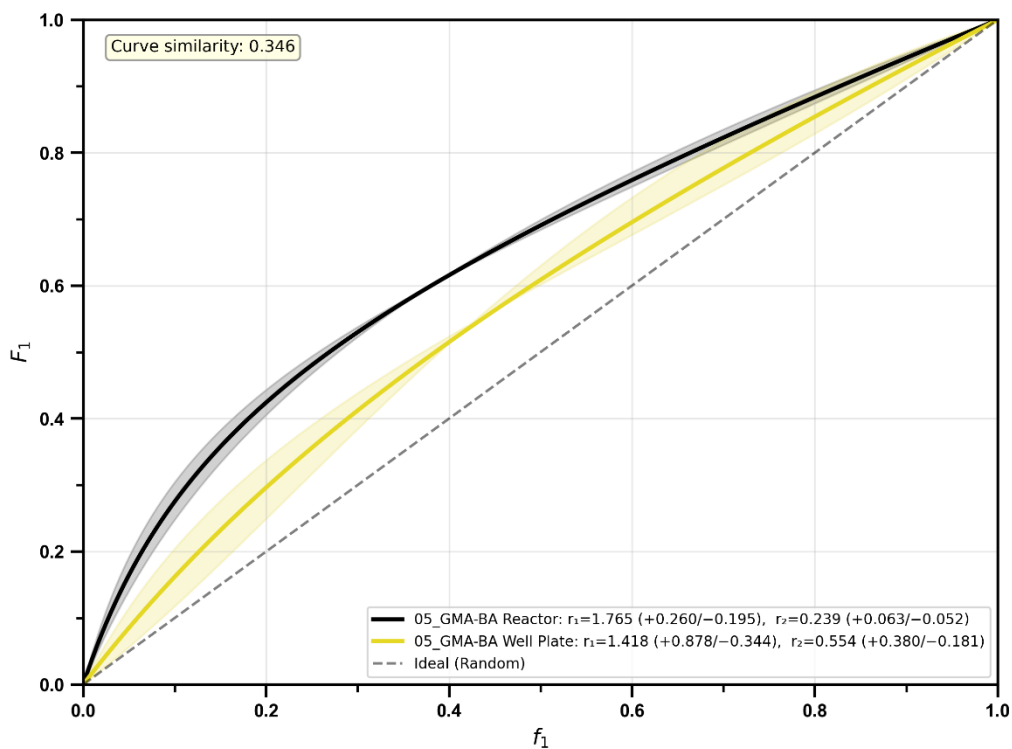

Figure S 14. Comparison of Copolymer Composition Curves for GMA-BA. The Mayo-Lewis copolymer composition curves from GMA-BA reactivity ratios derived using the reactor (black solid line) and well plate (yellow solid line) formats.

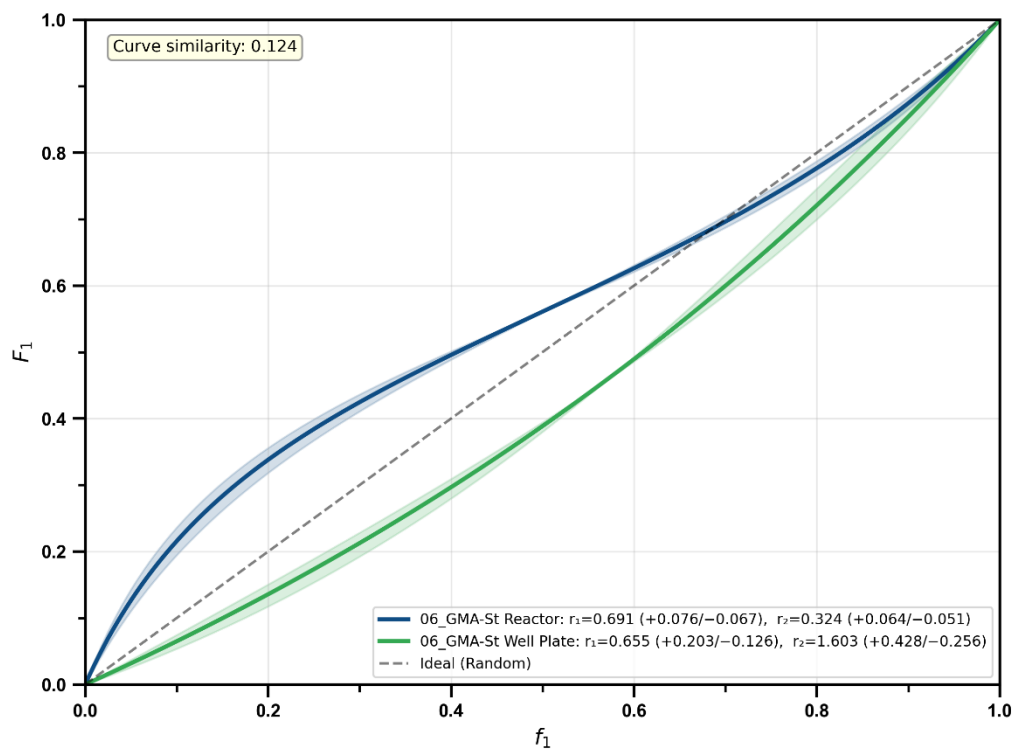

Figure S 15. Comparison of Copolymer Composition Curves for GMA-St. The Mayo-Lewis copolymer composition curves from GMA-St reactivity ratios derived using the reactor (navy solid line) and well plate (green solid line) formats.

## 5. NMR Spectra for Copolymerisations

The below figures show the stacked NMR spectra of  $t_0$  and  $t_1$  samples for all comonomer pairs. Notably, within the  $t_0$  spectra, the changing monomer fractions can be seen with the increase in intensity of monomer 1 peaks (orange) and decrease in intensity of monomer 2 peaks (yellow) across experiments sharing the same AIBN loading. Within the  $t_1$  spectra, the effect of increased AIBN loading can be seen with the decrease in intensity of both monomer 1 and monomer 2 peaks (e.g., samples 1-4 share 0.05 wt% AIBN loading and are of higher intensity than samples 17-20 which are of 2.00 wt% AIBN loading).

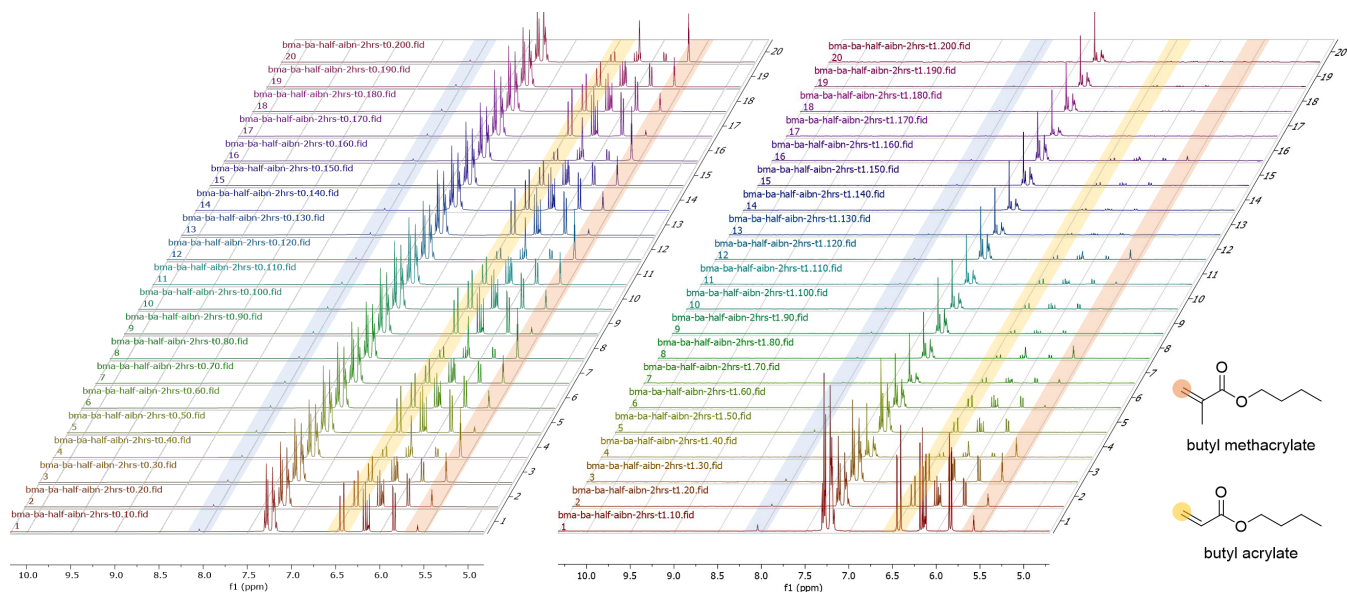

Figure S 16. Stacked  $^1\text{H}$  NMR spectra of BMA and BA for  $t_0$  (left) and  $t_1$  (right) samples shown side-by-side. Highlights contain the peaks that were picked and integrated for BMA (orange), BA (yellow), and the DMF internal standard (blue).

The specific vinyl protons integrated for each monomer are indicated on the provided structures.

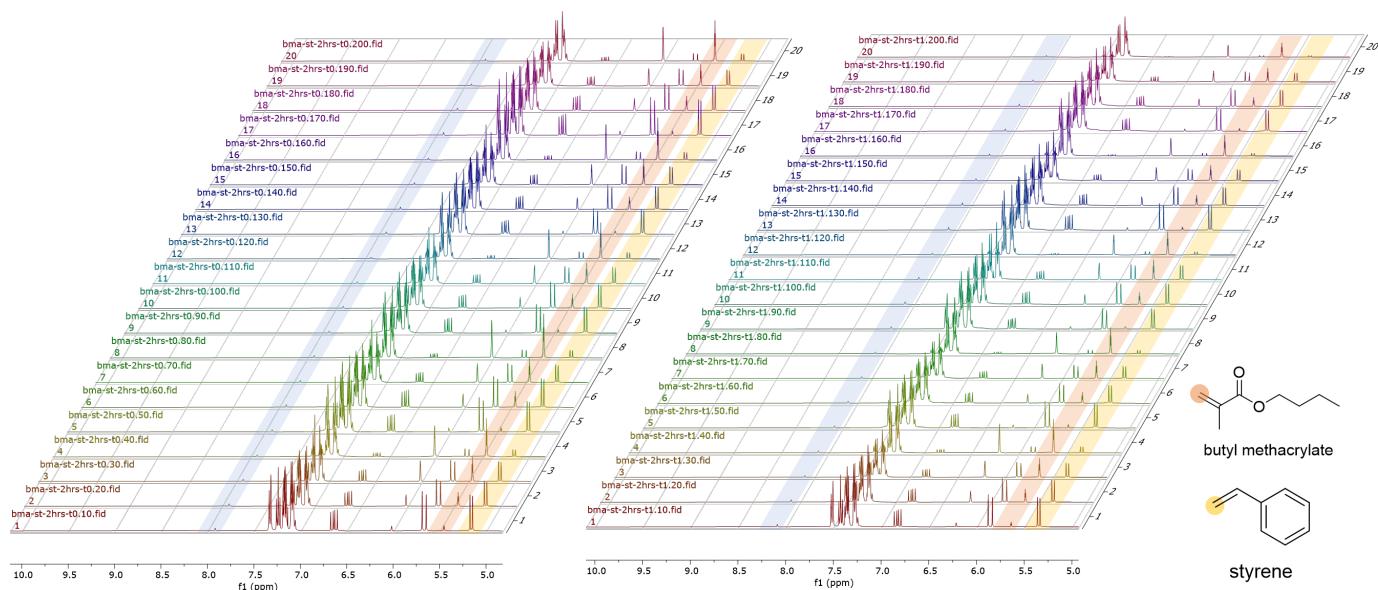

Figure S 17. Stacked  $^1\text{H}$  NMR spectra of BMA and St for  $t_0$  (left) and  $t_1$  (right) samples shown side-by-side. Highlights contain the peaks that were picked and integrated for BMA (orange), St (yellow), and the DMF internal standard (blue). The specific vinyl protons integrated for each monomer are indicated on the provided structures.

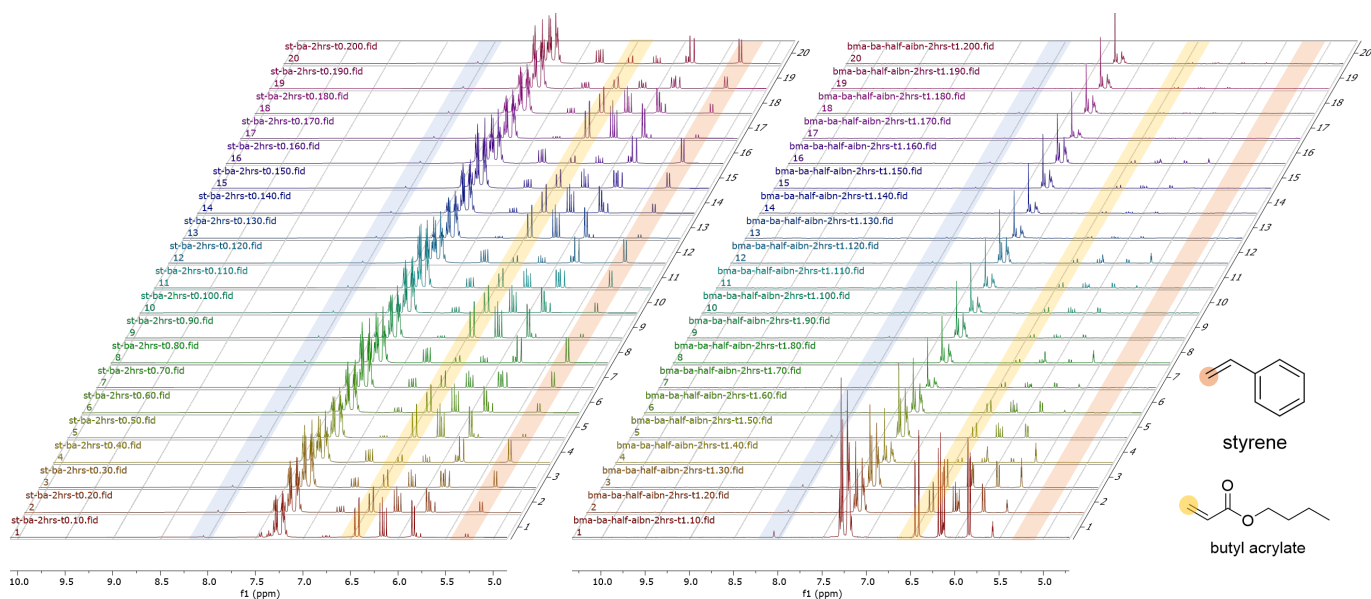

Figure S 18. Stacked  $^1\text{H}$  NMR spectra of St and BA for  $t_0$  (left) and  $t_1$  (right) samples shown side-by-side. Highlights contain the peaks that were picked and integrated for St (orange), BA (yellow), and the DMF internal standard (blue). The specific vinyl protons integrated for each monomer are indicated on the provided structures.

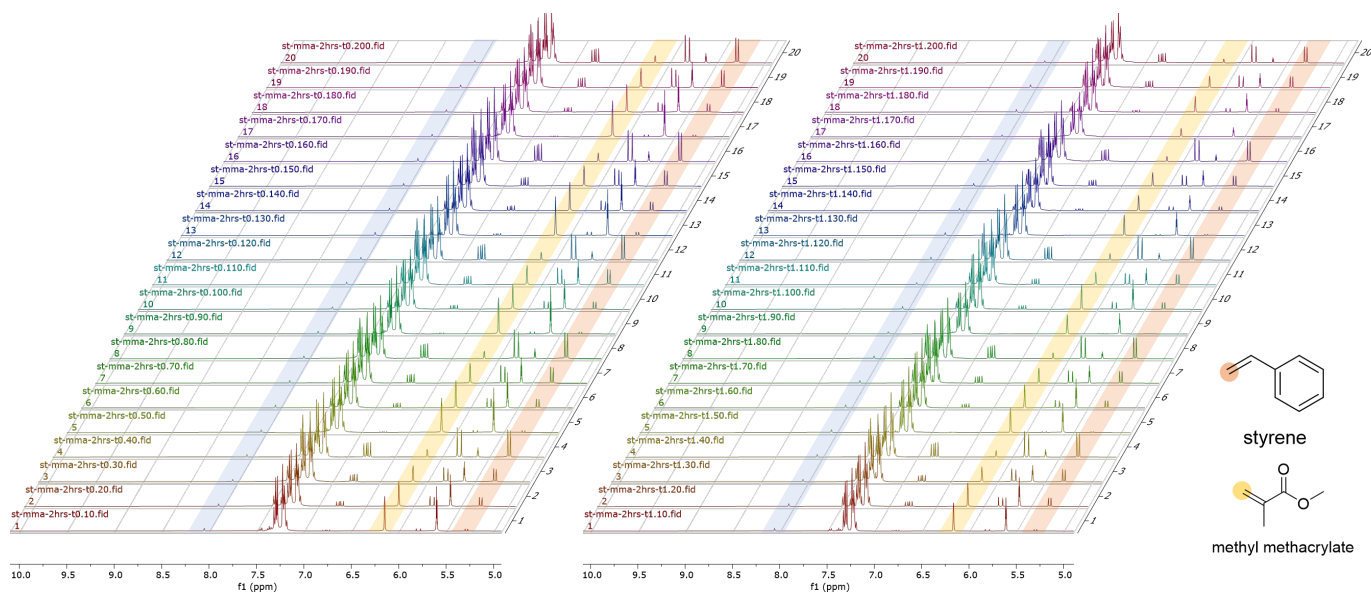

Figure S 19. Stacked  $^1\text{H}$  NMR spectra of BMA and MMA for  $t_0$  (left) and  $t_1$  (right) samples shown side-by-side. Highlights contain the peaks that were picked and integrated for BMA (orange), MMA (yellow), and the DMF internal standard (blue). The specific vinyl protons integrated for each monomer are indicated on the provided structures.

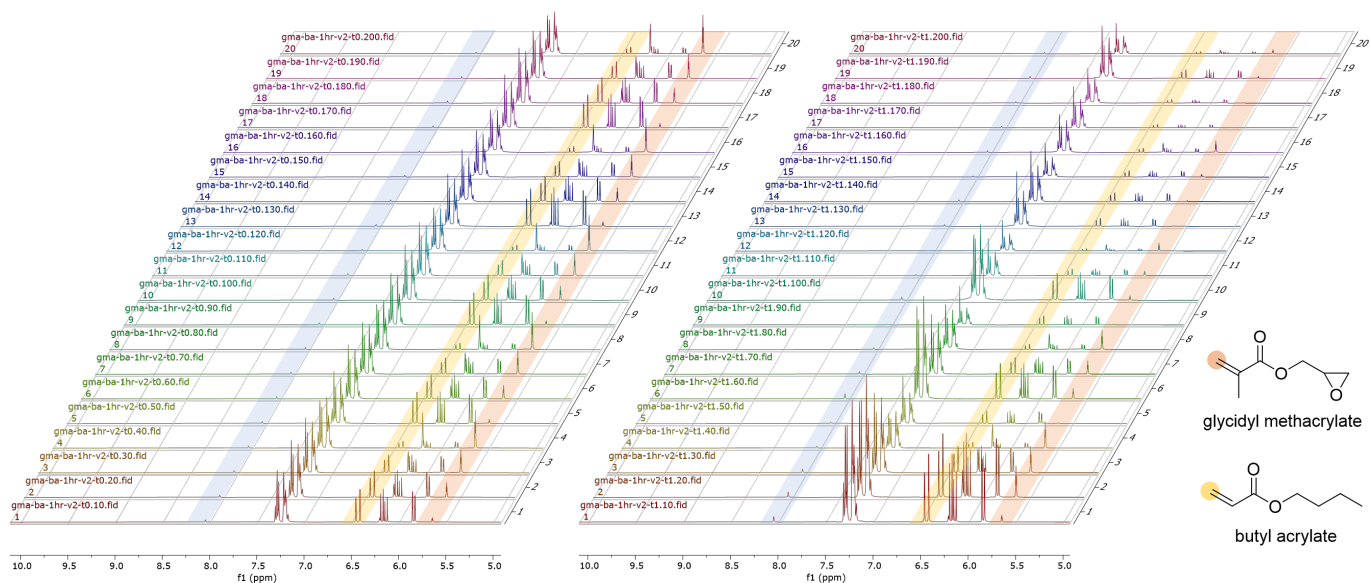

Figure S 20. Stacked  $^1\text{H}$  NMR spectra of GMA and BA for  $t_0$  (left) and  $t_1$  (right) samples shown side-by-side. Highlights contain the peaks that were picked and integrated for GMA (orange), BA (yellow), and the DMF internal standard (blue).

The specific vinyl protons integrated for each monomer are indicated on the provided structures.

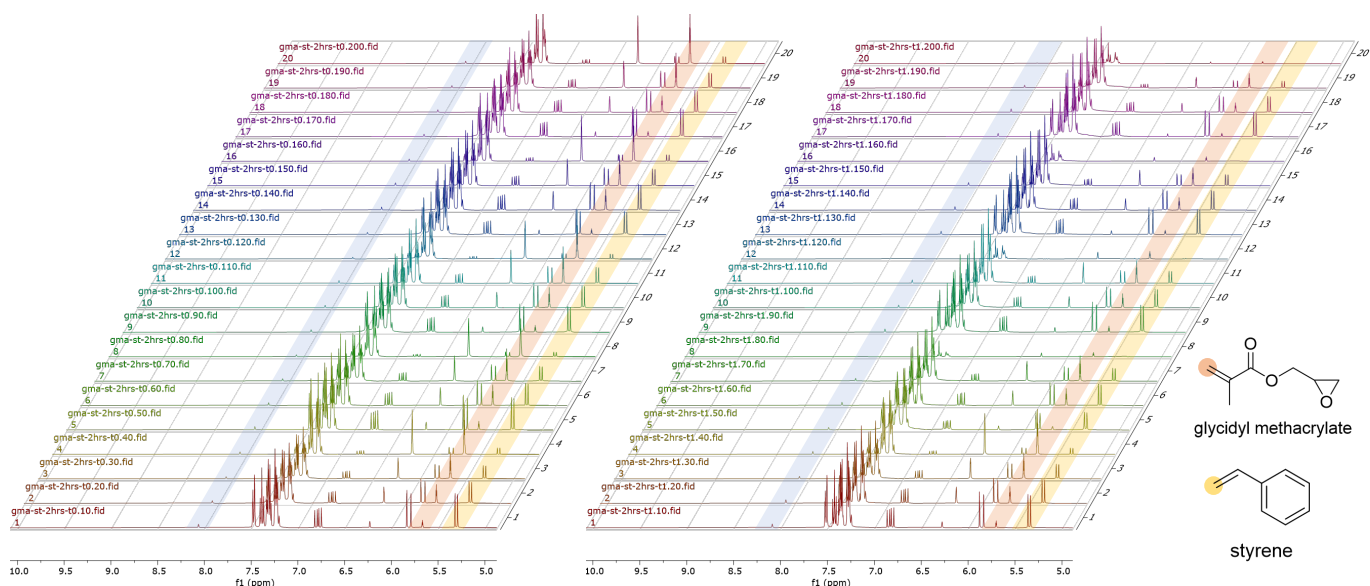

Figure S 21. Stacked  $^1\text{H}$  NMR spectra of GMA and St for  $t_0$  (left) and  $t_1$  (right) samples shown side-by-side. Highlights contain the peaks that were picked and integrated for GMA (orange), St (yellow), and the DMF internal standard (blue). The specific vinyl protons integrated for each monomer are indicated on the provided structures.



## References

- [1] A. M. van Herk, Software package Contour issue 2.4.0, accessed 03/04/2024 Contour 2.4.0., Can be found under <https://github.com/IUPAC-Polymer-Division/Reactivity-Ratios>
- [2] K.-i. Takahashi, H. Mamitsuka, M. Tosaka, N. Zhu, S. Yamago, CoPolDB: a copolymerization database for radical polymerization, *Polymer Chemistry* **2024**, *15*, 965-971.
- [3] T. R. Paxton, Copolymerization reactivity ratios acrylic and methacrylic acids with butyl acrylate and butyl methacrylate, *Journal of Polymer Science Part B: Polymer Letters* **1963**, *1*, 73-76.
- [4] T. Otsu, T. Fukui, メタクリル酸アルキルのラジカル共重合反応性, *工業化学雑誌* **1966**, *69*, 986-990.
- [5] G. M. Burnett, P. Evans, H. W. Melville, Polymerization of esters of methacrylic acid. Part I.—the polymerization of n-butyl methacrylate, *Transactions of the Faraday Society* **1953**, *49*, 1096-1104.
- [6] C. I. Simionescu, B. C. Simionescu, S. Ioan, Plasma-Induced Living Radical Copolymerization, *Journal of Macromolecular Science: Part A - Chemistry* **1985**, *22*, 765-778.
- [7] L. K. Kostanski, A. E. Hamielec, Influence of temperature on butyl acrylate — styrene copolymerization parameters, *Polymer* **1992**, *33*, 3706-3710.
- [8] E. J. Arlman, H. W. Melville, Studies in copolymerization The evaluation of the kinetic coefficients for the system styrene-butyl acrylate, *Proceedings of the Royal Society of London. Series A. Mathematical and Physical Sciences* **1950**, *203*, 301-321.
- [9] E. J. Arlman, H. W. Melville, L. Valentine, The copolymerisation of styrene and methyl methacrylate, styrene and butyl acrylate, *Recueil des Travaux Chimiques des Pays-Bas* **1949**, *68*, 945-959.
- [10] J. H. Bradbury, H. W. Melville, The co-polymerization of styrene and butyl acrylate in benzene solution, *Proceedings of the Royal Society of London. Series A. Mathematical and Physical Sciences* **1954**, *222*, 456-470.
- [11] J. Aoyagi, K. Kitamura, I. Shinohara, スチレン-アクリル酸ブチル-四塩化炭素系の低共重合反応, *工業化学雑誌* **1970**, *73*, 2045-2048.
- [12] G. Kaszás, T. Földes-Berezsnich, Tüdo, x030B, F. s, Kinetics of radical copolymerization—XI. Investigation of the rate of initiation and copolymer composition of the system styrene-butyl acrylate benzene, *European Polymer Journal* **1984**, *20*, 395-398.
- [13] F. M. Lewis, C. Walling, W. Cummings, E. R. Briggs, F. R. Mayo, Copolymerization. IV. Effects of Temperature and Solvents on Monomer Reactivity Ratios, *Journal of the American Chemical Society* **1948**, *70*, 1519-1523.
- [14] A. Uehara, T. Nishi, T. Tsuyuri, A. Tamura, J. Murata, ジヒドロピラン環を含むβ-ジケトン銅(II)キレートを開始剤とするスチレンの共重合, *工業化学雑誌* **1967**, *70*, 750-754.
- [15] E. L. Madruga, J. S. Román, M. A. Del Puerto, Radical Copolymerization of Acrylic Monomers. II Effect of Solvent on Radical Copolymerization of Methyl Methacrylate and Styrene, *Journal of Macromolecular Science: Part A - Chemistry* **1979**, *13*, 1105-1115.
- [16] S.-A. Chen, L.-C. Tsai, Kinetics and mechanism of inhibition of an antioxidant type inhibitor in free radical vinyl copolymerizations, *Die Makromolekulare Chemie* **1986**, *187*, 653-666.
- [17] P. K. Dhal, M. S. Ramakrishna, G. N. Babu, Copolymerization of glycidyl methacrylate with alkyl acrylate monomers, *Journal of Polymer Science: Polymer Chemistry Edition* **1982**, *20*, 1581-1585.
- [18] Y. Iwakura, T. Kurosaki, N. Nakabayashi, Reactive fiber. Part I. Copolymerization and copolymer of acrylonitrile with glycidyl methacrylate and with glycidyl acrylate, *Die Makromolekulare Chemie* **1961**, *44*, 570-590.
- [19] J. A. Simms, Epoxide-substituted vinyl and acrylate copolymers, *Journal of Applied Polymer Science* **1961**, *5*, 58-63.
- [20] P. K. Dhal, Spectroscopic Methods for the Determination of Monomer Reactivity Ratios in Glycidyl Methacrylate-Styrene Copolymerization, *Journal of Macromolecular Science: Part A - Chemistry* **1986**, *23*, 181-187.
